# Supplementary material for: Mechanistic molecular responses of the giant clam Tridacna crocea to Vibrio coralliilyticus challenge
Source: PLoS One. 2020 Apr 10;15(4):e0231399. doi: 10.1371/journal.pone.0231399 (PMC7148125; doi:10.1371/journal.pone.0231399)
Supplement: S3 Table — (XLSX) [file pone.0231399.s007.xlsx]

## Sheet: Sheet1
gene_id	Name	sample_readcount(V0)	sample_readcount(V6)	sample_readcount(V12)	sample_readcount(V24)	sample_fpkm(V0)	sample_fpkm(V6)	sample_fpkm(V12)	sample_fpkm(V24)
Cluster-16329.126099	phage lysozyme 2	563.76	965.41	1205.04	552.31	45.97	81.62	93.97	39.6
Cluster-16329.8205	Bcl-2-binding component 3	14.02	182.51	485.67	47.38	0.46	6.26	15.28	1.37
Cluster-16329.73392	C-type lectin domain family 4 member M	7765.22	32407.9	39104.8	13098.3	859.37	3710.68	4145.68	1275.57
Cluster-16329.101982	Interferon-induced transmembrane protein	711.62	2490	2767.89	793	45.18	164.1	167.86	44.24
Cluster-16329.114101	Bcl2-interacting killer	147	649	700	181	2.23	10.26	10.12	2.41
Cluster-16329.57423	Interferon-induced transmembrane protein	769.43	2271.66	2073.59	2100.7	26.25	80.64	67.47	62.94
Cluster-16329.96386	TNF receptor-associated factor 6 protein	225	968	1022	618	5.87	26.27	25.4	14.15
Cluster-16329.76199	toll-like receptor 13	130.17	448	396	256.8	2.07	7.41	5.99	3.58
Cluster-16329.9066	TNF(Tumour Necrosis Factor) family	16	287	173	100	1.69	31.29	17.45	9.27
Cluster-16329.128814	apoptosis-stimulating of p53 protein 1-like	198	627	427	331	3.41	11.26	7.02	5.01
Cluster-16329.41806	inhibitor of nuclear factor-kappaB	460.66	957.02	637.51	582.94	11.43	24.73	15.08	12.7
Cluster-16329.63358	interleukin-17-6	21	858.03	124	56.52	1.67	70.7	9.42	3.95
Cluster-16329.73240	Nuclear factor NF-kappa-B	658.01	1510.35	1350.12	689.43	59.85	142.34	117.5	55.15
Cluster-16329.56364	alpha-N-acetylgalactosamine-specific lectin-like	24	267	166	15	0.91	10.58	6.03	0.5
Cluster-16329.61625	interleukin-1 receptor-associated kinase 4	630	2266	1483	619	21.94	82.1	49.26	18.93
Cluster-16329.95467	C-type lectin domain family 4 member M	1261.52	4506.56	3209.26	1323.18	194.6	717	475.45	179.82
Cluster-36844.1	MyD88	202	357	340	248	6.02	11.07	9.66	6.49
Cluster-16329.57724	mucosa-associated lymphoid tissue lymphoma translocation protein 1	548	2261	1607	781	18.54	79.6	51.86	23.21
Cluster-16329.134628	apoptosis inhibitor 2	653	1383.82	1085	805.33	23.94	52.78	37.95	25.93
Cluster-16329.90095	Interferon-induced transmembrane protein	342.29	1924.59	1004.98	572.26	351.04	1939.62	1031.77	522.19
Cluster-16329.21121	Beta defensin	145	897.55	486.98	235	32.8	208.36	106.25	46.92
Cluster-16329.66470	C-type lectin	320	180	921	50	7.57	4.43	20.77	1.04
Cluster-16329.88689	positive regulation of I-kappaB kinase	650	674	1389	1037	31.5	33.95	64.25	44.15
Cluster-16329.92428	interferon-induced protein 44-like isoform X1	348	364	2156	1034.06	6.1	6.65	36.03	15.92
Cluster-16329.139308	D-galactoside-specific lectin	63	64	635	350	0.35	0.37	3.36	1.71
Cluster-16329.99550	Galactose binding lectin	177.81	322.71	635.01	360.51	22.85	42.85	78.25	40.79
Cluster-40944.1	TNF receptor-associated factor 4-like isoform X2	12	15	213	11	0.46	0.6	7.78	0.37
Cluster-16329.47281	E-selectin	42	56	412	83	1.4	1.94	13.1	2.43
Cluster-16329.109898	C-type lectin superfamily 17 member A	822	3296	642.99	1105.76	82.08	340.77	61.46	97.13
Cluster-16329.18533	Bcl-2-binding component 3	189	649.4	125	234	13.18	46.98	8.33	14.34
Cluster-16329.47632	TNF(Tumour Necrosis Factor) family	637	1811.79	367.01	799	45.77	135.08	25.21	50.47
Cluster-16329.126548	C-type lectin domain family 4 member	102	526	17.01	102.24	75.03	384.76	12.39	66.92
Cluster-16329.70777	sialic acid binding lectin	195	717.01	209	518	6.31	24.13	6.45	14.71
Cluster-16329.56284	TRAF-type zinc finger	301	830.89	342	424	25.01	71.57	27.18	30.98
Cluster-16329.45681	interferon regulatory factor 2	78	335	130	120	4.15	18.52	6.6	5.61
Cluster-16329.20169	interferon-induced protein 44-like isoform X2	38	382	71	84	2.24	23.35	3.99	4.34
Cluster-16329.140111	C-type lectin	39.08	245.03	652.4	980.84	9.29	59.72	149.68	205.86
Cluster-16329.87779	Interleukin-1 / 18	906.54	337.75	1071.74	8960.78	1136.68	413.25	1354.66	9984.41
Cluster-16329.135266	Bcl-2 homology region 4	3	4	21	393	0.03	0.05	0.23	3.94
Cluster-16329.25481	Toll-like receptor 4	544	154	522	759	11.98	3.53	10.96	14.67
Cluster-16329.76184	toll-like receptor f precursor	333	58.01	158	669	8.75	1.59	3.96	15.43
Cluster-16329.64854	Perlucin-like protein	918.62	464.84	414.94	817.43	154.06	80.32	66.88	120.81
Cluster-16329.92664	TIR domain	219.74	17.01	26	107	10.65	0.86	1.2	4.56
Cluster-16329.92662	TIR domain	193	14	13	77	23.04	1.73	1.49	8.09
Cluster-16329.64867	perlucin-like protein isoform X2	894.39	114.15	191.06	280.08	81.92	10.83	16.75	22.56
Cluster-16329.69155	H-type lectin	2595.3	1113	1860	2082.98	305.31	135.39	209.69	215.66
Cluster-16329.141347	Lactose-binding lectin l-2	714	1069	140	547	35.91	55.87	6.72	24.17
Cluster-16329.104149	membrane-bound C-type lectin	1209	991	303	980	55.86	47.59	13.36	39.78
Cluster-16329.67302	sialic acid-binding lectin	1176.45	660.09	217.49	1053.93	52.65	30.71	9.29	41.43
Cluster-16329.100490	Phage lysozyme	1349	1094.81	612	1459.39	109.45	92.1	47.48	104.11
Cluster-16329.76178	toll-like receptor h precursor	29905	21869	24143	15121	654.23	498.18	503.36	290.4
Cluster-16329.86659	Fas apoptotic inhibitory molecule (FAIM1)	5538.94	3453	2794	1568	256.11	165.95	123.29	63.69
Cluster-16329.105010	interferon-inducible GTPase 5-like	3781.75	164	106	98	103.22	4.66	2.76	2.35
Cluster-16329.68962	interferon regulatory factor 2-binding protein-like	3286	2631	1442	2095	103.03	85.84	43.11	57.68
Cluster-16329.87762	BCL3	25179	20470	6077	6996	2124.67	1790.48	490.47	519.11
